# Supplementary material
Source: Springer Nature journal article supplement (https://www.springermedizin.de/resource/supplementary/12985_2011_1295_MOESM4_ESM.pdf/9609482)

(A)

(i) D1-D4

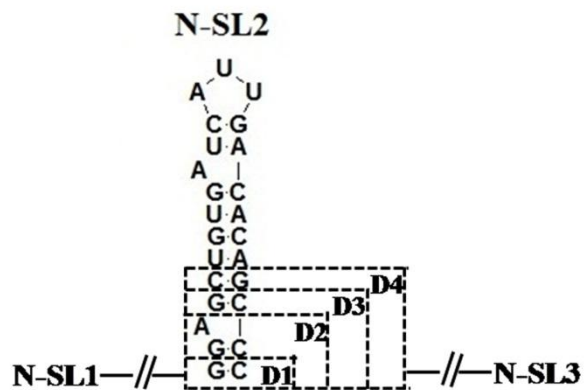

(ii) D5

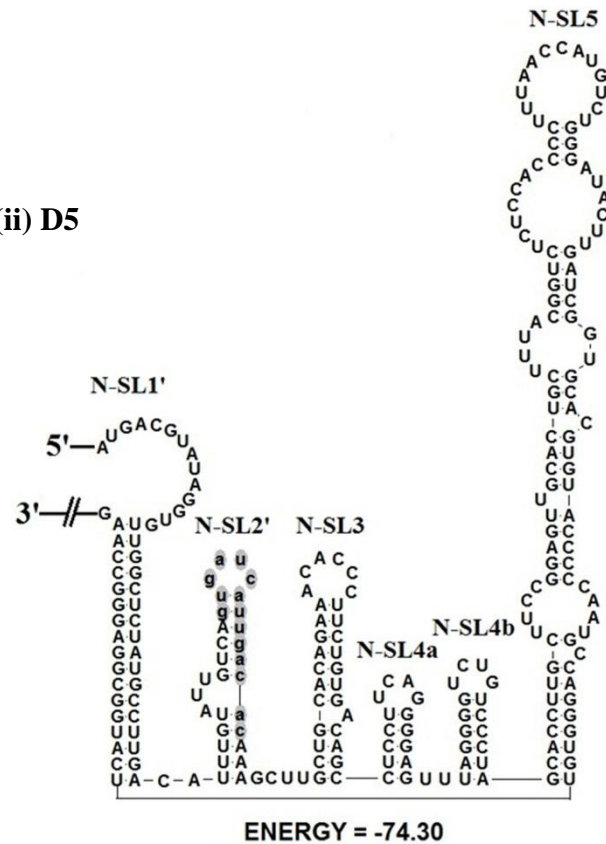

(iii) D6

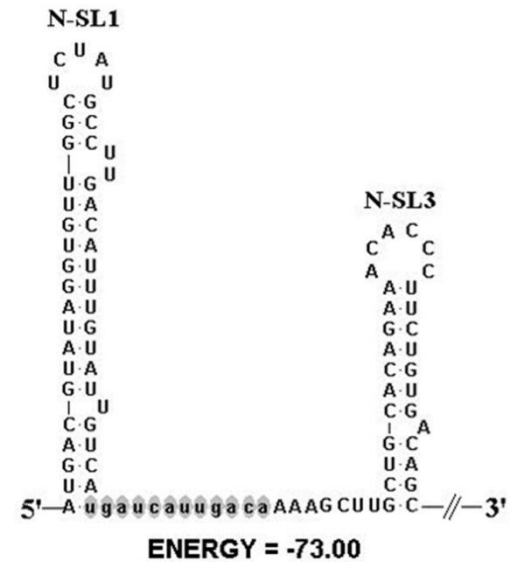

(B)

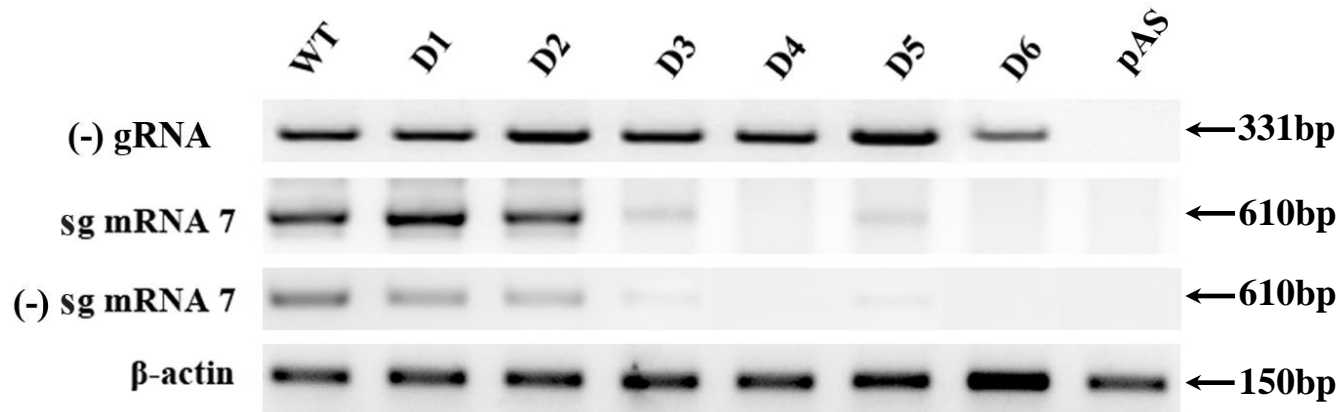

Supplement: MOESM4 [file 9609482]
